# Supplementary material
Source: PubMed Central journal article supplement (PMC4815594)
Supplement: hdy201469x2.pdf [file hdy201469x2.pdf]

**Table S2.** Comparison of mean CN between males from Tunisia and Italy (Mann-Whitney tests). Rb = Rb homozygotes; F1= Rb heterozygotes between the Tunisian Rb and St populations; HYB= F1 and hybrids between the Italian Rb and St populations; St = Standard homozygotes. Data for the homozygous Rb and St Tunisian mice are from Dumas and Britton-Davidian (2002). Corrected levels of significance using the sequential Bonferroni tests (Dunn-Sidak method, see [Sokal, 1995, p. 241) are provided as follows: \* p< 0.05, \*\* p< 0.01, \*\*\* p< 0.001, ns: p> 0.05.

|           | Tunisia       |              |              | Italy        |              |
|-----------|---------------|--------------|--------------|--------------|--------------|
|           | Rb            | F1           | St           | Rb           | HYB          |
| Rb        | -1.779<br>ns  | -0.613<br>ns | -2.881<br>** |              |              |
| Italy HYB | -3.781<br>*** | -2.194<br>ns | -1.550<br>ns | -3.003<br>** |              |
| St        | -3.065<br>**  | -2.327<br>*  | -0.613<br>ns | -2.514<br>*  | -1.227<br>ns |
