# Supplementary material
Source: PubMed Central journal article supplement (PMC4815594)

**Fig. S1**

**a)**

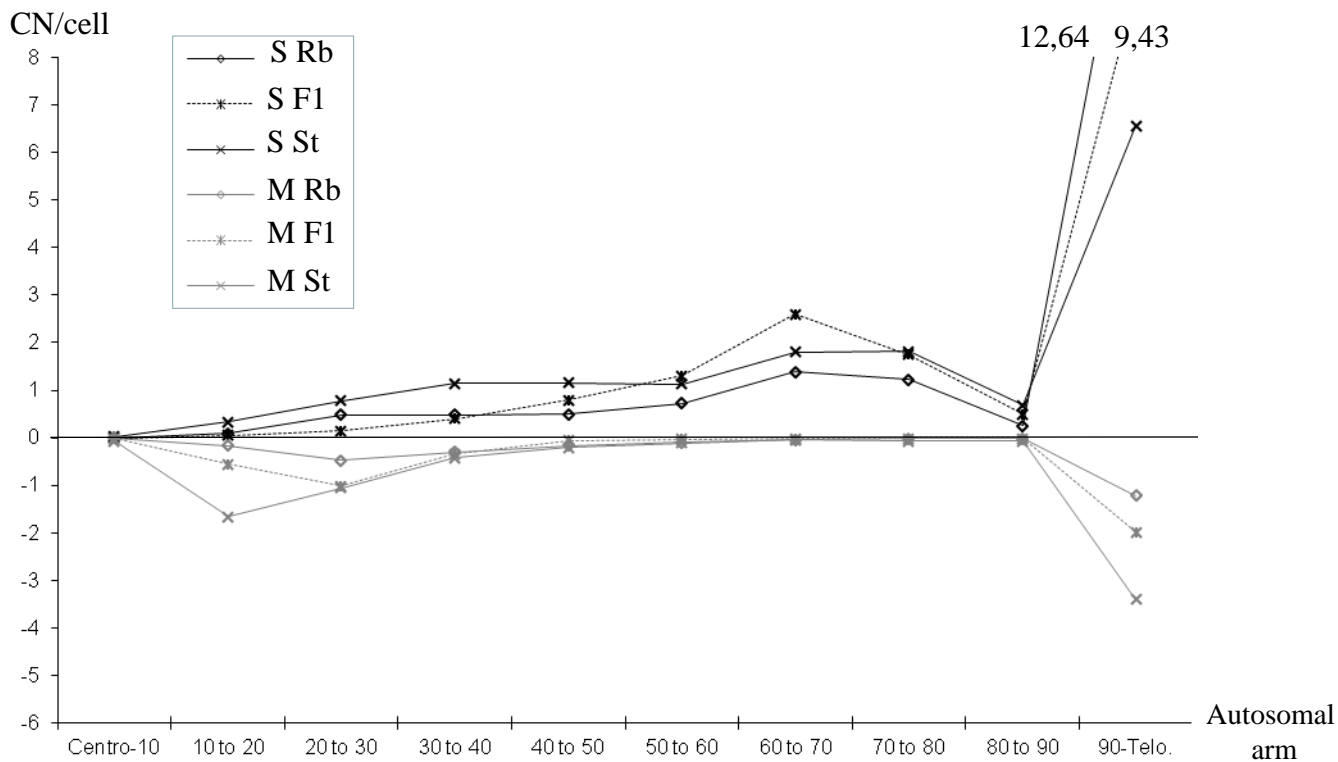

**b)**

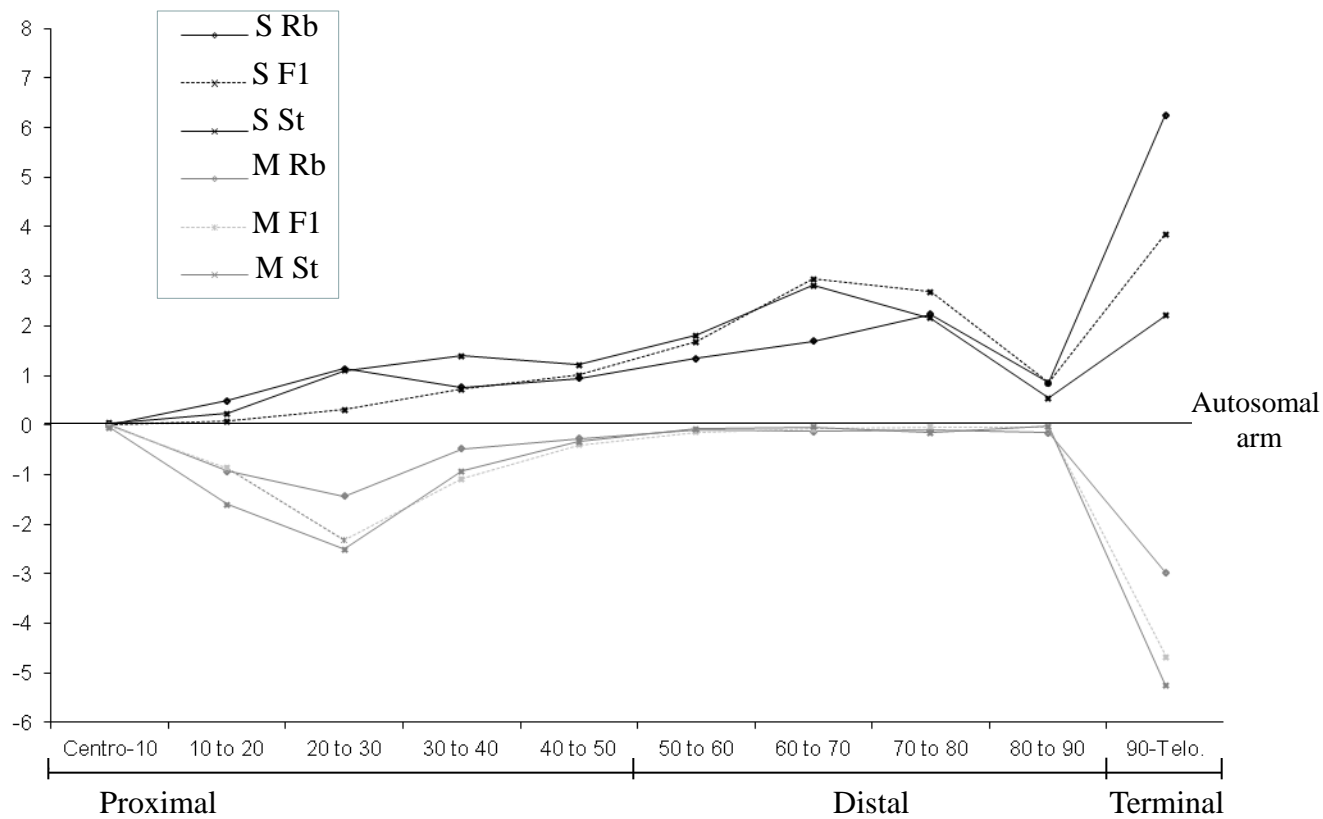

Supplement: hdy201469x4.pdf [file hdy201469x4.pdf]
